# Supplementary material for: Stepwise synthesis of heterotrimetallic FeII/PdII/AuI coordination cages
Source: Royal Society of Chemistry journal article supplement (doi:10.1039/d4qi00340c), 2024-01-01
Supplement: d4qi00340c1.pdf [file d4qi00340c1.pdf]

## Electronic Supplementary Information

### Stepwise synthesis of heterotrimetallic Fe<sup>II</sup>/Pd<sup>II</sup>/Au<sup>I</sup> coordination cages

Noga Eren,<sup>[a]</sup> Farzaneh Fadaei-Tirani,<sup>[a]</sup> and Kay Severin\*<sup>[a]</sup>

<sup>a</sup> Institut des Sciences et Ingénierie Chimiques, Ecole Polytechnique Fédérale de Lausanne (EPFL),  
1015 Lausanne, Switzerland. E-mail: [kay.severin@epfl.ch](mailto:kay.severin@epfl.ch)

## Table of contents

|     |                                      |    |
|-----|--------------------------------------|----|
| 1   | General.....                         | 3  |
| 2   | Syntheses.....                       | 4  |
| 2.1 | Synthesis of complex 1.....          | 4  |
| 2.2 | Synthesis of complex 2.....          | 6  |
| 2.3 | Synthesis of complex 3.....          | 8  |
| 2.4 | Synthesis of cage 4 .....            | 11 |
| 2.5 | Synthesis of cage 5 .....            | 14 |
| 3   | Crystallographic Data .....          | 17 |
| 3.1 | Crystal structure of complex 1 ..... | 17 |
| 3.2 | Crystal structure of complex 2 ..... | 20 |
| 3.3 | Crystal structure of complex 3 ..... | 23 |
| 4   | References .....                     | 26 |

## 1 General

All reagents were obtained from commercial sources and used without further purification unless stated otherwise. Complex **1** and complex **2** were synthesized in analogy to reported procedures.<sup>1,2</sup>

NMR spectra were measured on a Bruker Avance III HD spectrometer (<sup>1</sup>H: 600 MHz, <sup>13</sup>C: 151 MHz) equipped with a CPPBBO<sub>z</sub> 5 mm probe a Bruker Avance III spectrometer (<sup>1</sup>H: 400 MHz, <sup>13</sup>C: 101 MHz) equipped with a BBFO<sub>z</sub> 5 mm probe and a Bruker Avance III spectrometer (<sup>1</sup>H: 400 MHz, <sup>13</sup>C: 101 MHz) equipped with a Prodigy BBO 5 mm cryoprobe. The chemical shifts are reported in part per million (ppm) using the solvent residual signal as a reference. The DOSY analysis was performed using the the Peak Height Fit DOSY transform from *MestrelNova*. The solvodynamic radii were calculated from the average diffusion coefficient, as determined by *MestrelNova*. The values were normalized using the solvent as an internal standard.<sup>3</sup> Literature values were used for the viscosity and the diffusion coefficient of DMSO at 298 K.<sup>4,5</sup>

Mass spectrometry analyses were performed on a LTQ Orbitrap FTMS instrument (LTQ Orbitrap Elite FTMS, Thermo Scientific, Bremen, Germany) operated in the positive mode coupled to HESI-II probe in an Ion Max ion Source. Samples were injected at an infusion rate of 10 µL/min. The experimental conditions for the ionization voltage was 1.2 kV whereas the temperature of ion transfer capillary was 80 °C. FTMS spectra were obtained using the high mass range between 200–4000 *m/z* range in the reduced profile mode with a resolution set to 120 K. In all spectra, one microscan was acquired with a maximum injection time value of 1000ms. Samples were diluted in ACN to a total concentration of around 0.05 mM.

The models of cage **4** and **5** were constructed using *Spartan* and it's MMF energy minimization.

## 2 Syntheses

### 2.1 Synthesis of complex 1

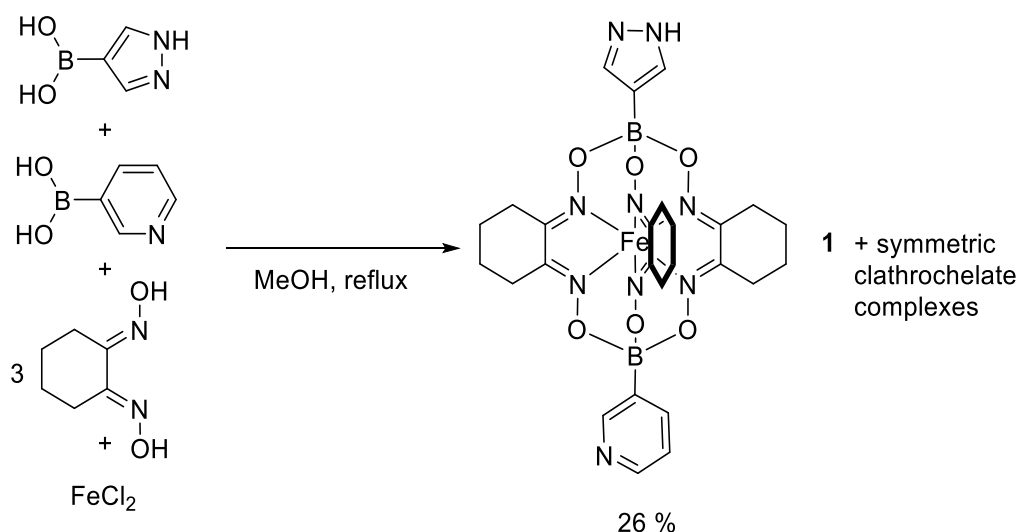

**Scheme S1.** Synthesis of complex 1.

Nioxime (200 mg, 1.4 mmol), pyridin-3-ylboronic acid (65 mg, 0.51 mmol), 4H-pyrazoleboronic acid (59 mg, 0.49 mmol) and anhydrous  $\text{FeCl}_2$  (60 mg, 0.49 mmol) were dissolved in MeOH (35 mL) and heated under reflux for 4 h under an atmosphere of  $\text{N}_2$ . The solvent was removed under reduced pressure. The product was dissolved in a minimum amount of  $\text{CHCl}_3$  and purified by column chromatography with a mixture of  $\text{CHCl}_3/\text{MeOH}/\text{triethylamine}$  (99:1:0.05) as eluent. Yield 88 mg, 26%.  $^1\text{H}$  NMR (400 MHz,  $\text{CD}_2\text{Cl}_2$ )  $\delta$  8.79 (s, 1H), 8.51 (dd,  $J = 4.9, 1.9$  Hz, 1H), 7.92 (dt,  $J = 7.5, 1.9$  Hz, 1H), 7.65 (s, 2H), 7.23 (ddd,  $J = 7.5, 4.9, 1.0$  Hz, 1H), 3.07 – 2.74 (m, 12H), 1.81 (m,  $J = 3.0$  Hz, 12H).  $^{13}\text{C}$  NMR (101 MHz,  $\text{CD}_2\text{Cl}_2$ )  $\delta$  153.29, 152.21, 149.25, 139.62, 123.20, 26.60, 21.99. (C-B pyrazole and C-B pyridine not detected). ESI-MS:  $m/z$  calculated for  $\text{C}_{26}\text{H}_{32}\text{B}_2\text{FeN}_9\text{O}_6^+$   $[\text{M}+\text{H}]^+$  644.2006, found 644.2024.

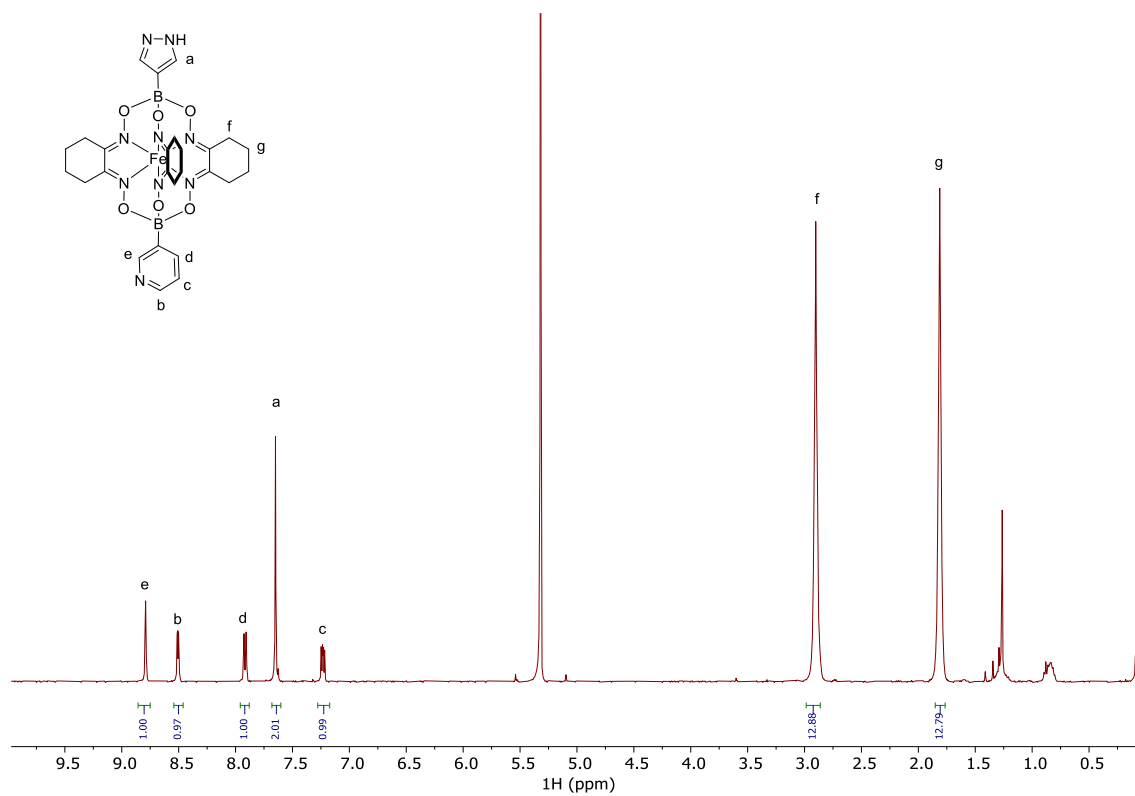

Figure S1.  $^1\text{H}$  NMR spectrum (400 MHz,  $\text{CD}_2\text{Cl}_2$ , 298 K) of complex 1.

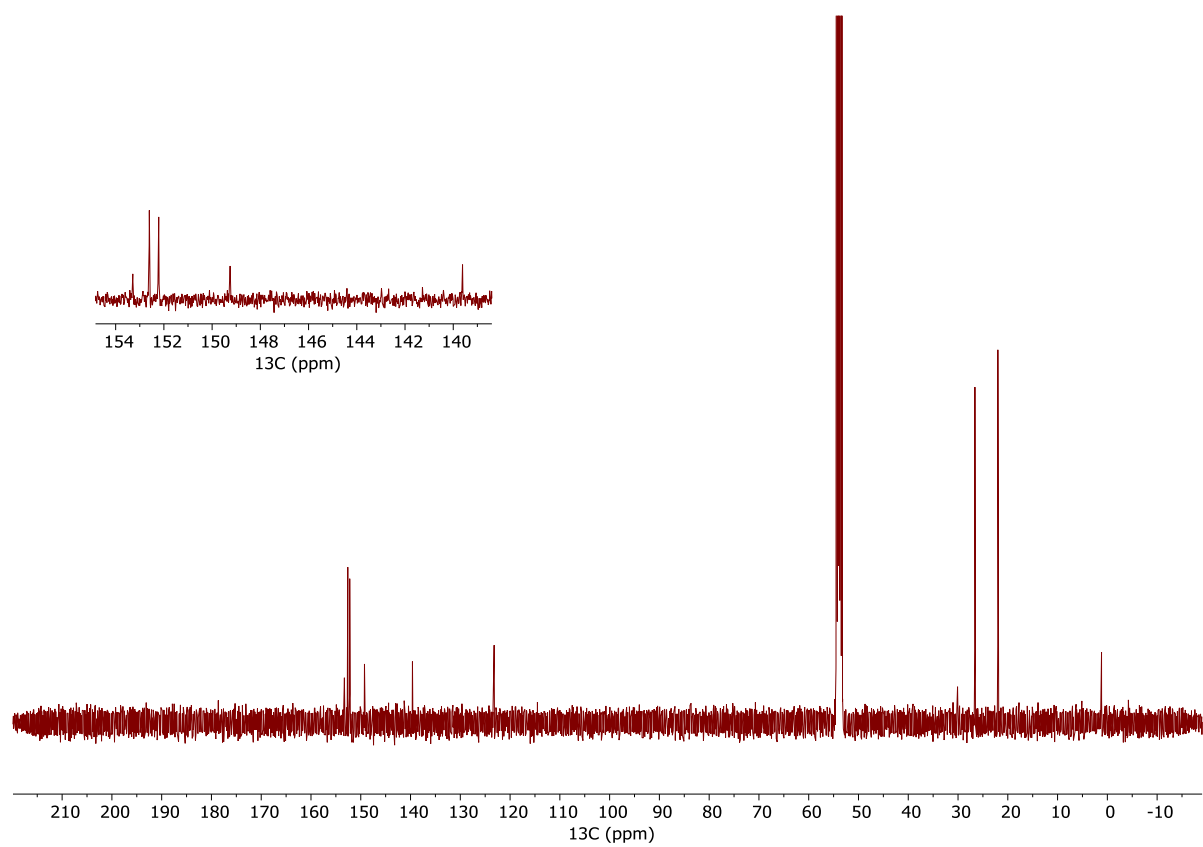

Figure S2.  $^{13}\text{C}$  NMR spectrum (101 MHz,  $\text{CD}_2\text{Cl}_2$ , 298 K) of complex 1.

## 2.2 Synthesis of complex 2

Triethylamine (50  $\mu$ L, 0.16 mmol) was added to a stirred solution of AuCl(SMe<sub>2</sub>) (17.3 mg, 0.06 mmol) and complex 1 (38 mg, 0.059 mmol) in THF (5 mL). The mixture was stirred for 18 h at RT under an atmosphere of N<sub>2</sub>. Subsequently, MeOH (approximately 25 mL) was added to precipitate the product and to dissolve the ammonium salt. The product was isolated by centrifugation and dried under vacuum. Yield: 43 mg, 87%. <sup>1</sup>H NMR (400 MHz, CD<sub>2</sub>Cl<sub>2</sub>)  $\delta$  8.80 (s, 1H), 8.51 (dd, *J* = 4.9, 1.9 Hz, 1H), 7.96 – 7.88 (m, 1H), 7.68 (s, 2H), 7.27 – 7.19 (m, 1H), 2.96 – 2.89 (m, 12H), 1.82 (t, *J* = 3.9 Hz, 12H). <sup>13</sup>C NMR (151 MHz, CD<sub>2</sub>Cl<sub>2</sub>)  $\delta$  152.55, 151.78, 151.46, 148.52, 142.33, 138.70, 25.79, 21.16 (C-B pyrazole and C-B pyridine not detected). ESI-MS: *m/z* calculated for C<sub>78</sub>H<sub>93</sub>Au<sub>3</sub>B<sub>6</sub>Fe<sub>3</sub>N<sub>27</sub>O<sub>18</sub><sup>3+</sup> [M+3H]<sup>3+</sup> 840.1593, found 840.1604.

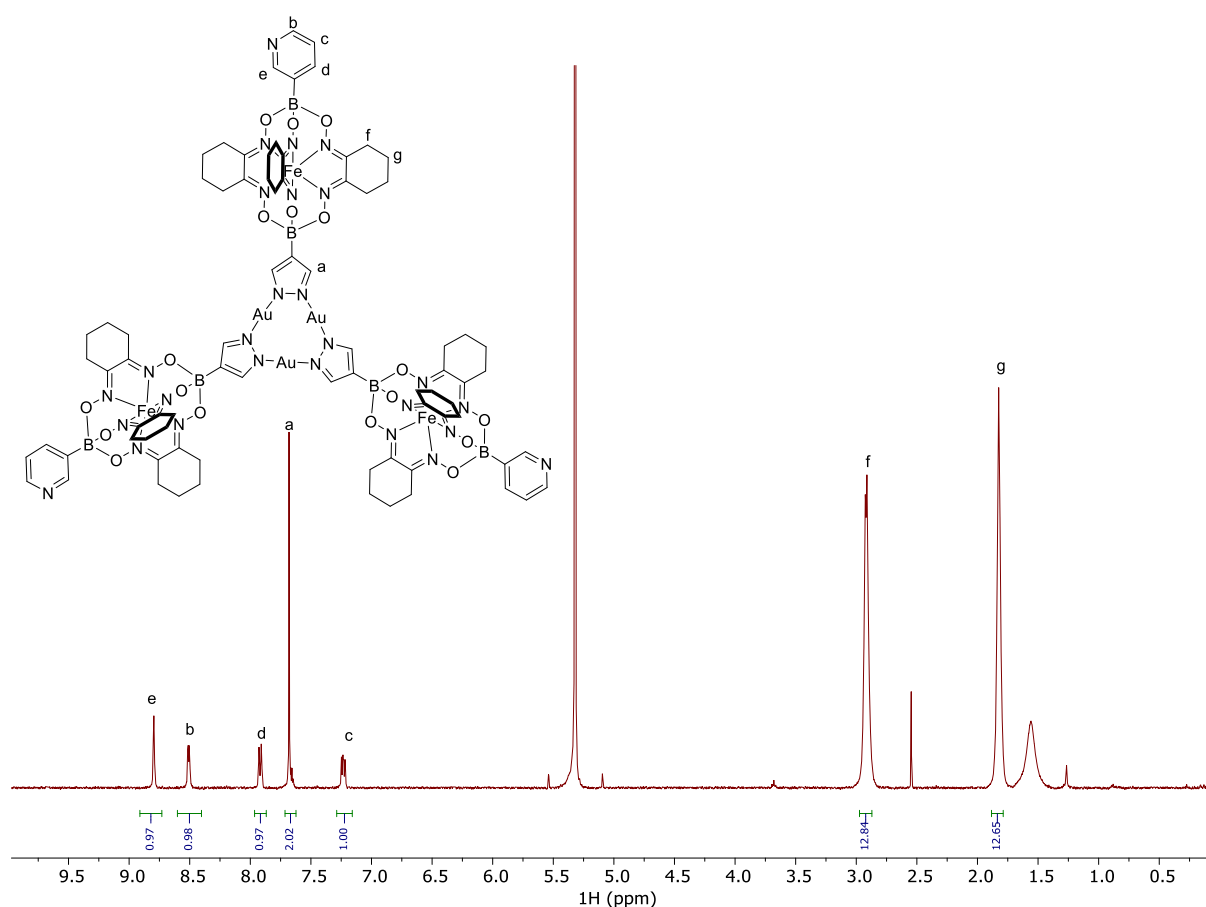

**Figure S3.** <sup>1</sup>H NMR spectrum (400 MHz, CD<sub>2</sub>Cl<sub>2</sub>, 298 K) of complex 2.

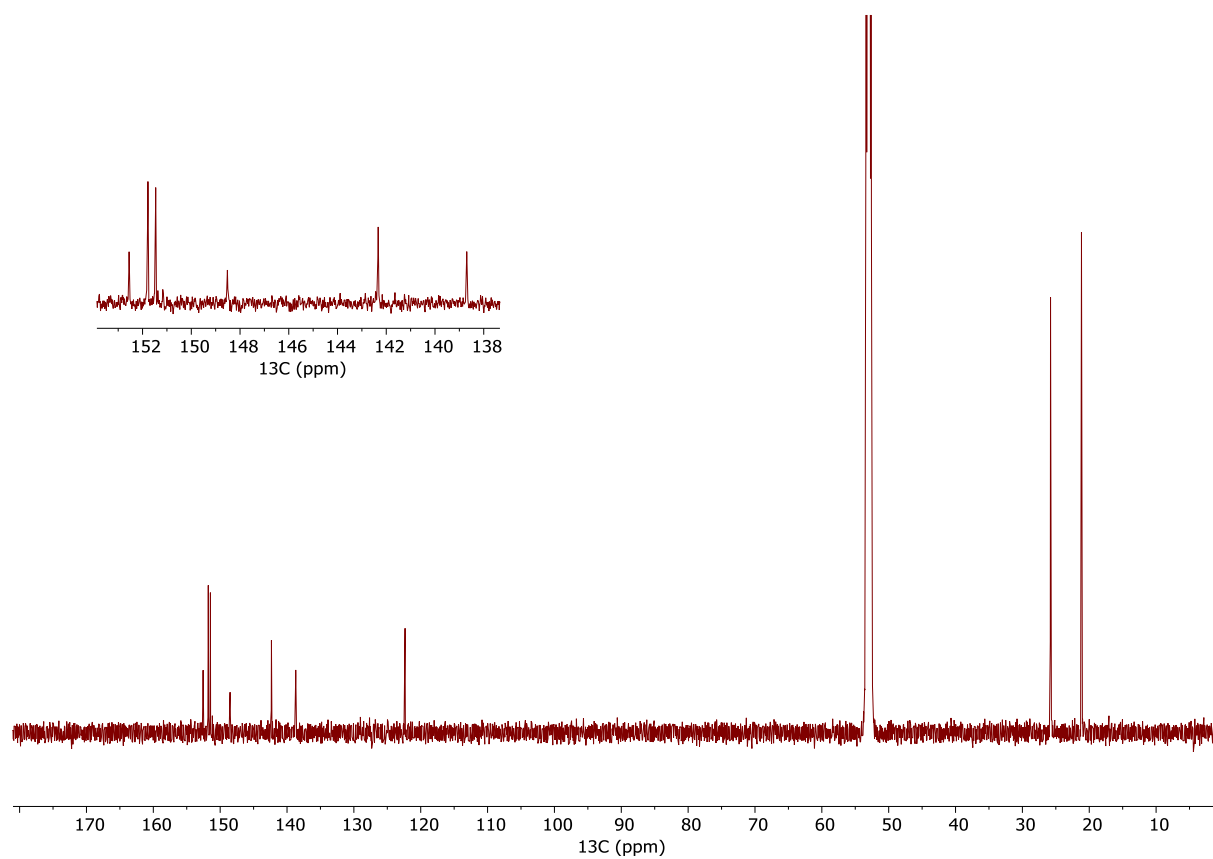

**Figure S4.**  $^{13}\text{C}$  NMR spectrum (151 MHz,  $\text{CD}_2\text{Cl}_2$ , 298 K) of complex **2**.

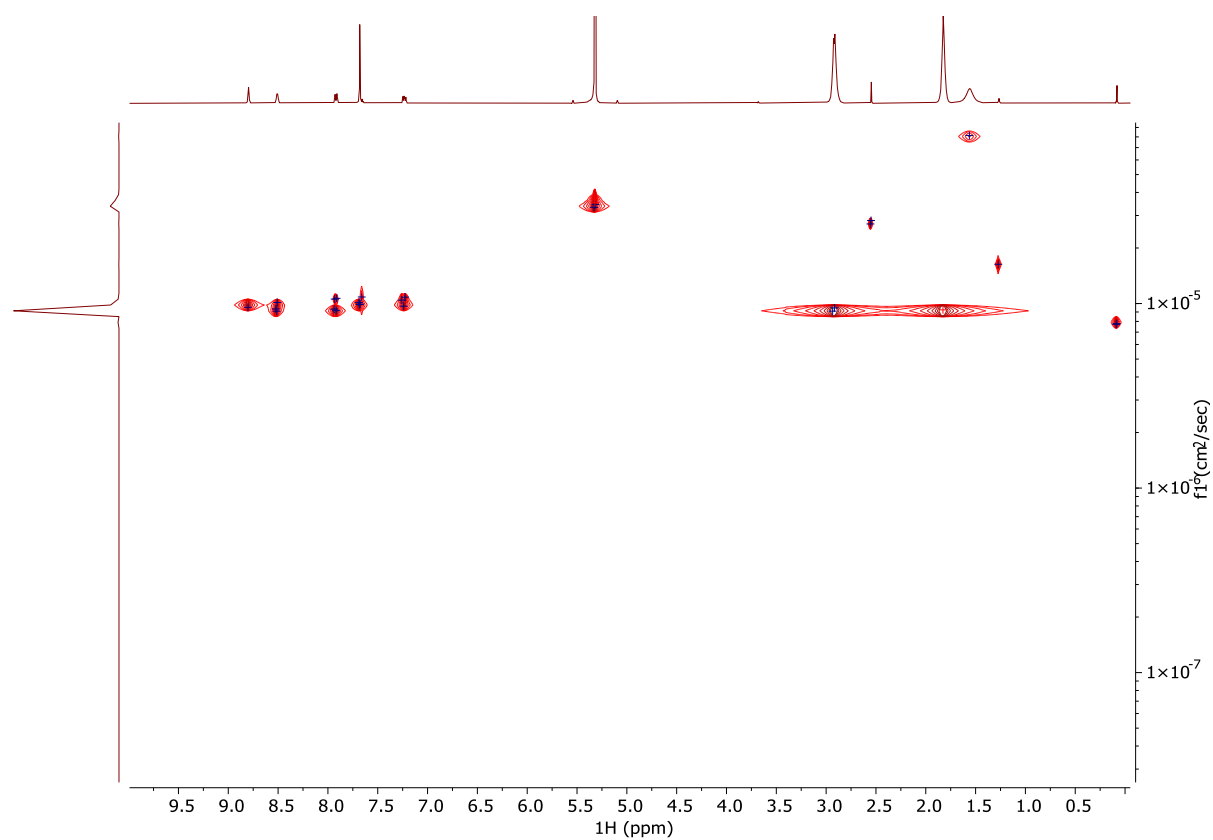

**Figure S5.**  $^1\text{H}$ - $^1\text{H}$  DOSY NMR spectrum (400 MHz,  $\text{CD}_2\text{Cl}_2$ ) of complex **2** ( $D = 9.14 \times 10^{-10} \text{ m}^2\text{s}^{-1}$ ).

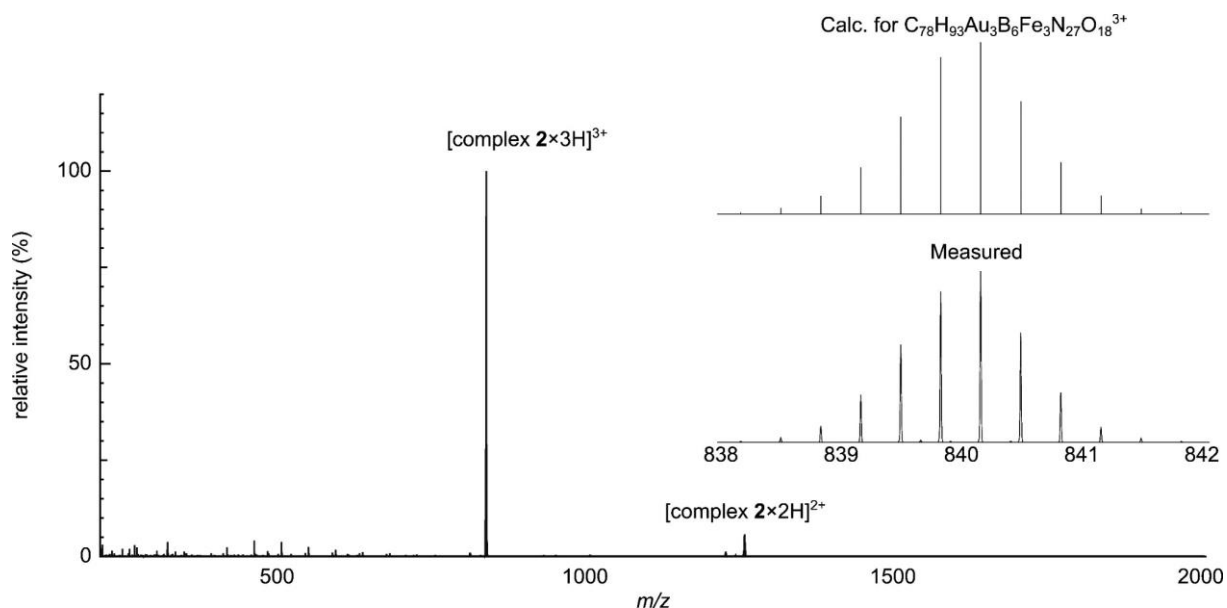

**Figure S6.** High-resolution ESI mass spectrum of complex **2**.

### 2.3 Synthesis of complex **3**

Triethylamine (30  $\mu$ L, 0.1 mmol) was added to a stirred solution of AuCl(SMe<sub>2</sub>) (35.6 mg, 0.12 mmol), complex **1** (51 mg, 0.08 mmol), and 3,5-dimethylpyrazole (3.84 mg, 0.04 mmol) in THF (20 mL). The mixture was stirred for 18 h at RT under an atmosphere of N<sub>2</sub>. The mixture was concentrated to about half the volume, and MeOH (approximately 30 mL) was added to precipitate the product and to dissolve the ammonium salt. The product was isolated by centrifugation, dissolved in CH<sub>2</sub>Cl<sub>2</sub>, and purified by column chromatography on silica with a mixture of CH<sub>2</sub>Cl<sub>2</sub>/MeOH (98:2) as eluent. Yield 12.3 mg, 15%. <sup>1</sup>H NMR (400 MHz, CD<sub>2</sub>Cl<sub>2</sub>)  $\delta$  8.80 (s, 2H), 8.51 (d,  $J$  = 4.9 Hz, 2H), 7.92 (d,  $J$  = 7.5 Hz, 2H), 7.73 – 7.62 (m, 4H), 7.27 – 7.20 (m, 2H), 6.23 (s, 1H), 2.94 – 2.89 (m, 24H), 2.32 (s, 6H), 1.86 – 1.79 (m, 24H). <sup>13</sup>C NMR (151 MHz, CD<sub>2</sub>Cl<sub>2</sub>)  $\delta$  152.49, 151.77, 151.44, 148.46, 148.23, 142.31, 142.22, 138.74, 122.36, 103.95, 25.79, 21.16, 12.78. (C-B pyrazole and C-B pyridine not detected). ESI-MS:  $m/z$  calculated for C<sub>57</sub>H<sub>69</sub>Au<sub>3</sub>B<sub>4</sub>Fe<sub>2</sub>N<sub>20</sub>O<sub>12</sub><sup>2+</sup> [M+2H]<sup>2+</sup> 986.1730, found 986.1778.



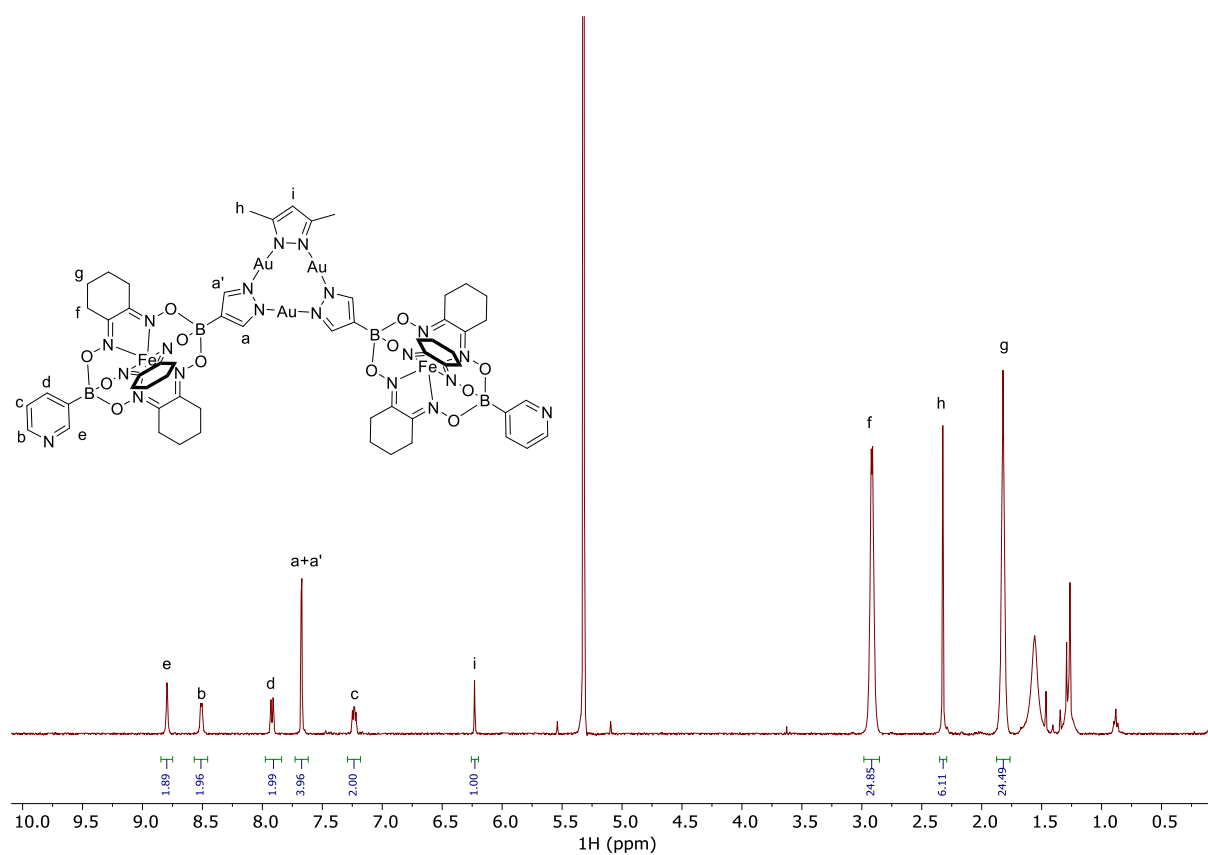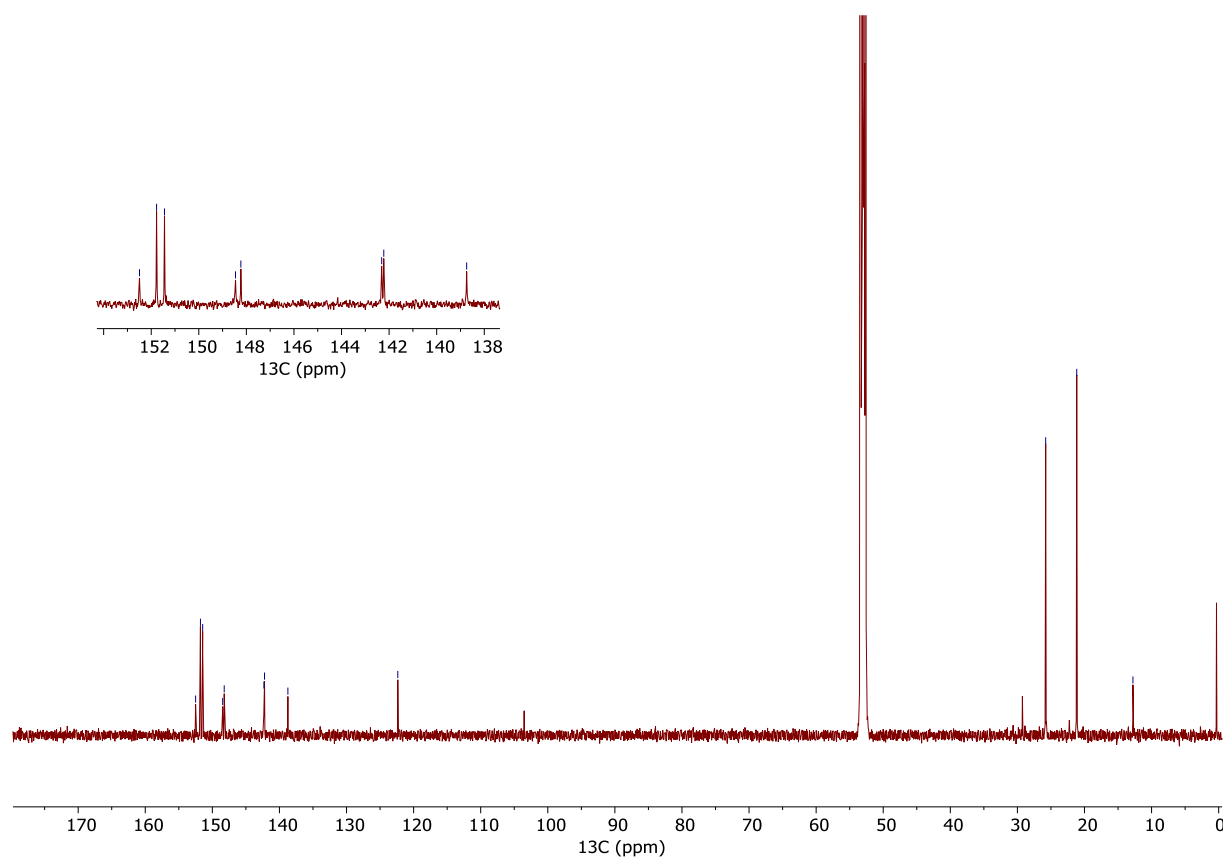

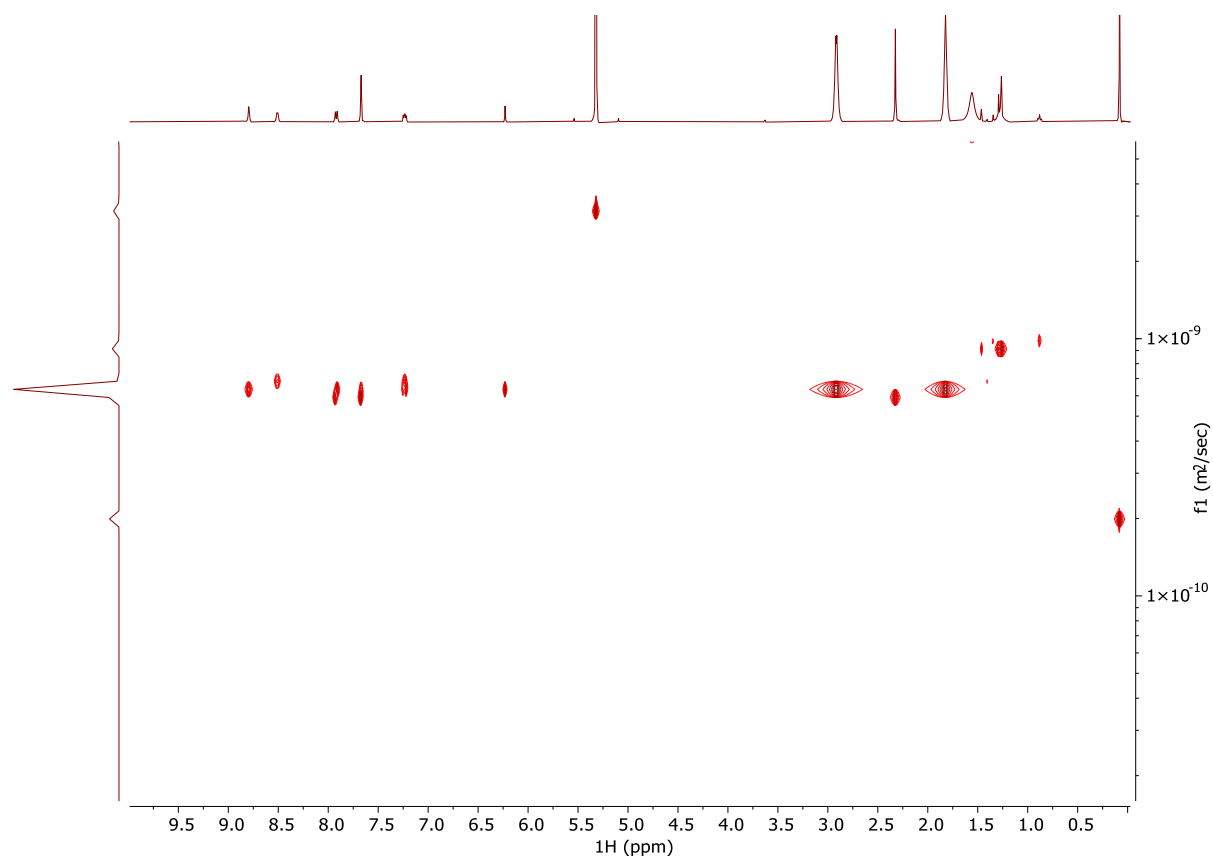

**Figure S9.**  $^1\text{H}$ - $^1\text{H}$  DOSY NMR spectrum (400 MHz,  $\text{CD}_2\text{Cl}_2$ ) of complex **3** ( $D = 6.36 \times 10^{-10} \text{ m}^2\text{s}^{-1}$ ).

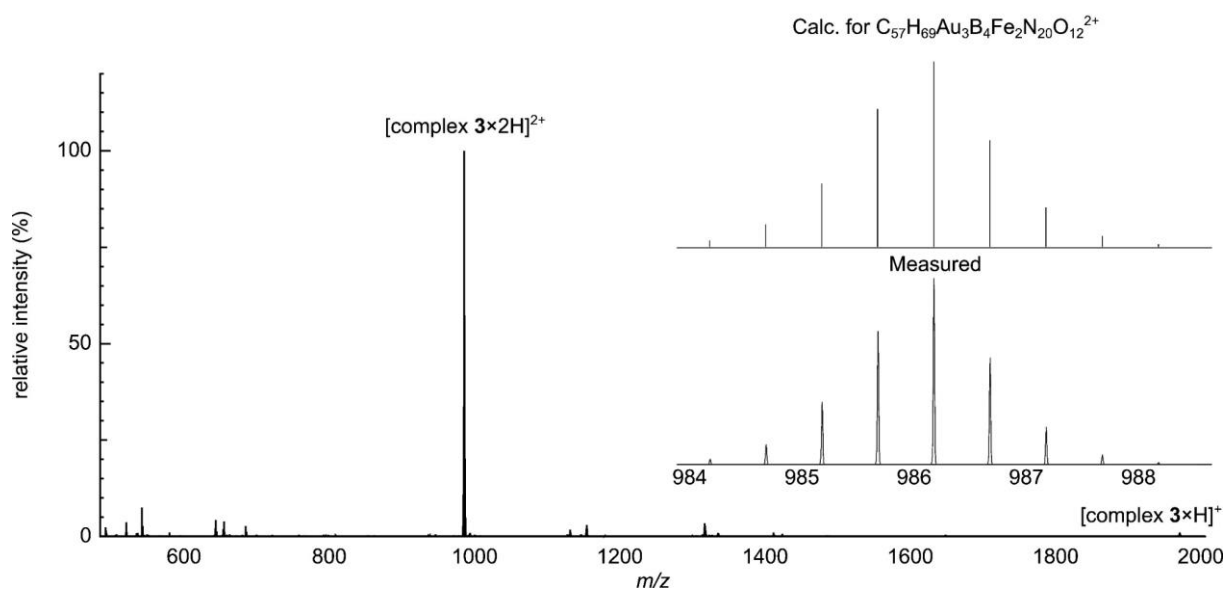

**Figure S10.** High-resolution ESI mass spectrum of complex **3**.

## 2.4 Synthesis of cage 4

A stock solution of  $[\text{Pd}(\text{CH}_3\text{CN})_4](\text{BF}_4)_2$  (4.66 mg, 10.5  $\mu\text{mol}$ ) in  $\text{DMSO-}d_6$  (349  $\mu\text{L}$ ) was prepared and 33  $\mu\text{L}$  were added to a suspension of complex **2** (3.31 mg, 1.31  $\mu\text{mol}$ ) in  $\text{DMSO-}d_6$  (477  $\mu\text{L}$ ). The mixture was heated to 60  $^\circ\text{C}$  for 15 h, during which a clear deep red solution was formed.  $^1\text{H}$  NMR (400 MHz,  $\text{DMSO-}d_6$ , 298K)  $\delta$  8.67 (s, ~1H,  $\text{H}_{b/d}$ ), 8.25 (s, ~1H,  $\text{H}_c$ ), 7.82 – 7.38 (m, ~4H,  $\text{H}_{b/d}$ ,  $\text{H}_a$ , and  $\text{H}_e$ ). The broad signals compromise the accuracy of the integrals. The  $\text{CH}_2$  protons of the Fe clathrochelate complex give rise to broad and ill-defined peaks between 1 and 3.5 ppm. Raising the temperature did not give better-resolved  $\text{CH}_2$  signals.

$^{13}\text{C}$  NMR: we have attempted to obtain a  $^{13}\text{C}$  NMR spectrum of cage **4** using a 600 MHz instrument. Despite an acquisition time of several hours, we were not able to obtain a spectrum with acceptable signal-to-noise ratio.

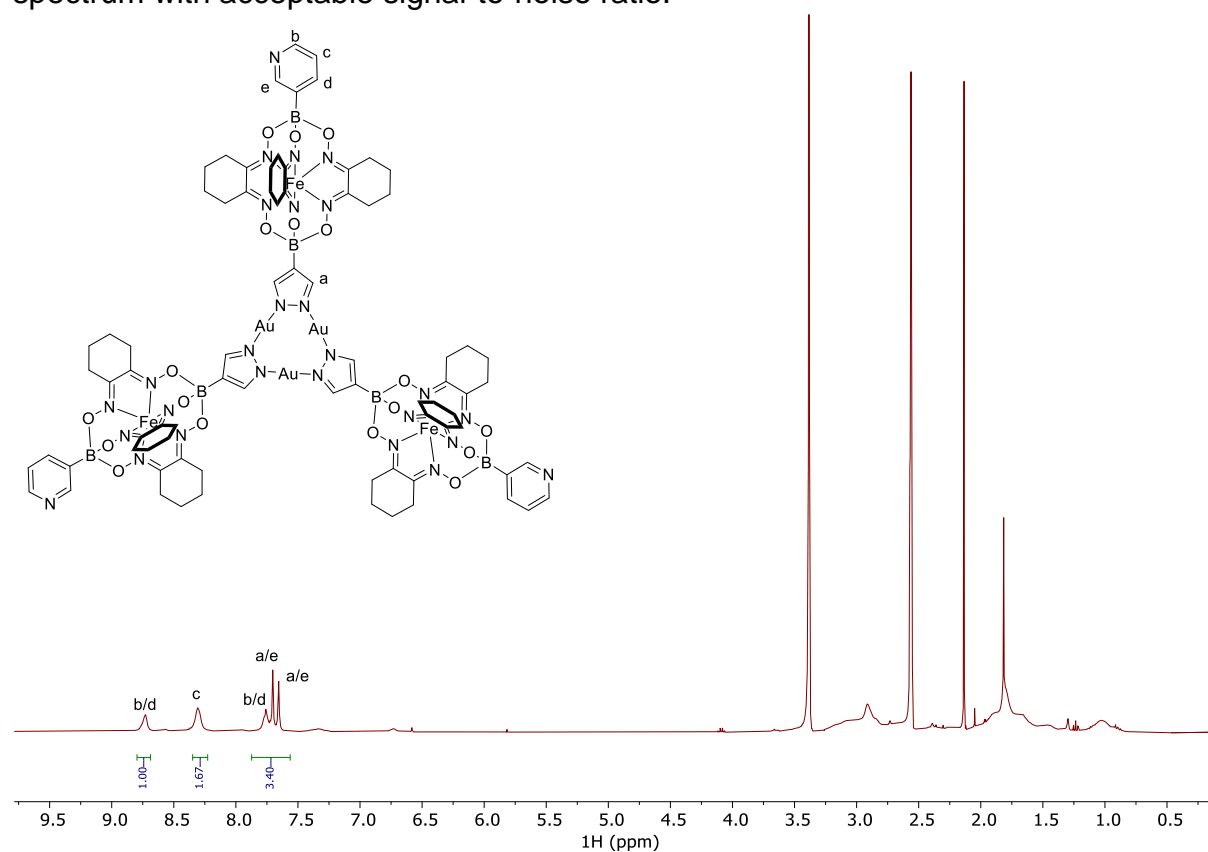

**Figure S11.**  $^1\text{H}$  NMR spectrum (400 MHz,  $\text{DMSO-}d_6$ , 298 K) of cage **4**. The small, broad peaks at 6.6 and 7.3 ppm point to the presence of a minor side product.

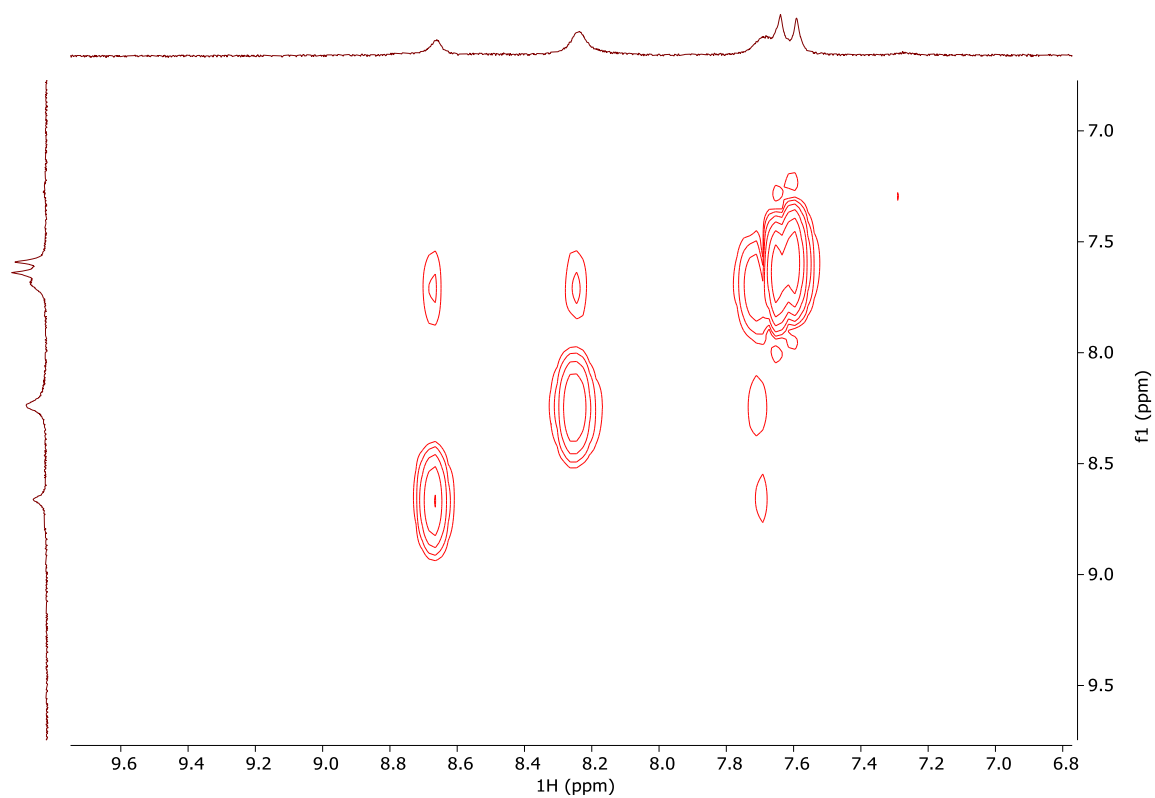

**Figure S12.** Aromatic part of  $^1\text{H}$ - $^1\text{H}$  COSY NMR spectrum (400 MHz,  $\text{CDCl}_3$ , 298 K) of cage 4.

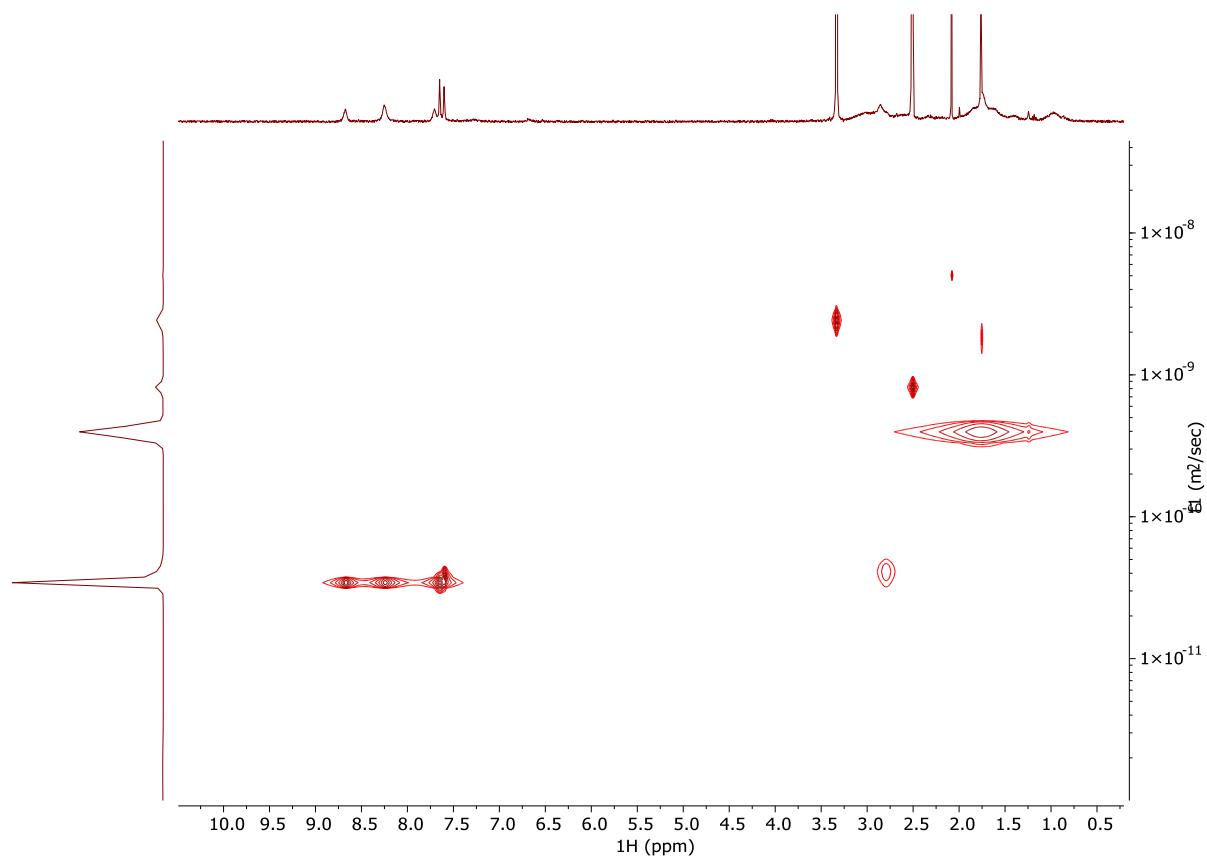

**Figure S13.**  $^1\text{H}$ - $^1\text{H}$  DOSY NMR spectrum (400 MHz,  $\text{DMSO}-d_6$ ) of cage 4 ( $D = 3.51 \times 10^{-11} \text{ m}^2\text{s}^{-1}$ , the calculated solvodynamic diameter of the cage is 4.3 nm).

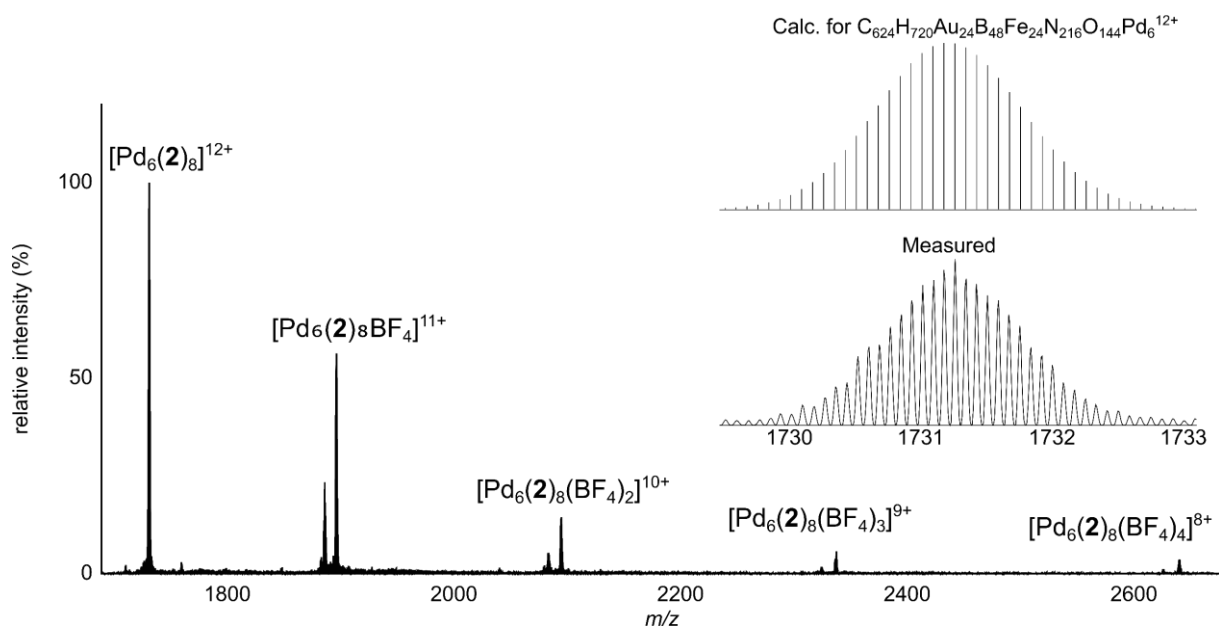

**Figure S14.** High-resolution ESI mass spectrum of cage **4**.

## 2.5 Synthesis of cage 5

Stock solution of  $[\text{Pd}(\text{CH}_3\text{CN})_4](\text{BF}_4)_2$  (1.55 mg, 3.49  $\mu\text{mol}$ ) in  $\text{DMSO-}d_6$  (90  $\mu\text{L}$ ) was prepared and 20  $\mu\text{L}$  were added to a suspension of complex **3** (3.04 mg, 1.54  $\mu\text{mol}$ ) in  $\text{DMSO-}d_6$  (480  $\mu\text{L}$ ). The mixture was heated to 60  $^\circ\text{C}$  while stirring. A clear deep red solution was observed within 15 min. The solution was kept at 60  $^\circ\text{C}$  overnight.  $^1\text{H}$  NMR (400 MHz,  $\text{DMSO-}d_6$ , 333 K)  $\delta$  8.68 (d,  $J = 5.7$  Hz, 2H), 8.29 (s, 2H), 8.24 (d,  $J = 7.5$  Hz, 2H), 7.72 – 7.63 (m, 6H), 6.32 (s, 1H), 2.84 (s, 12H), 2.40 (s, 9H, theoretic 12H), 2.27 (s, 6H), 1.67 – 1.46 (m, 22H, theoretic 24H).

As in the case of cage **4**, we were not able to obtain a  $^{13}\text{C}$  NMR spectrum of acceptable quality.

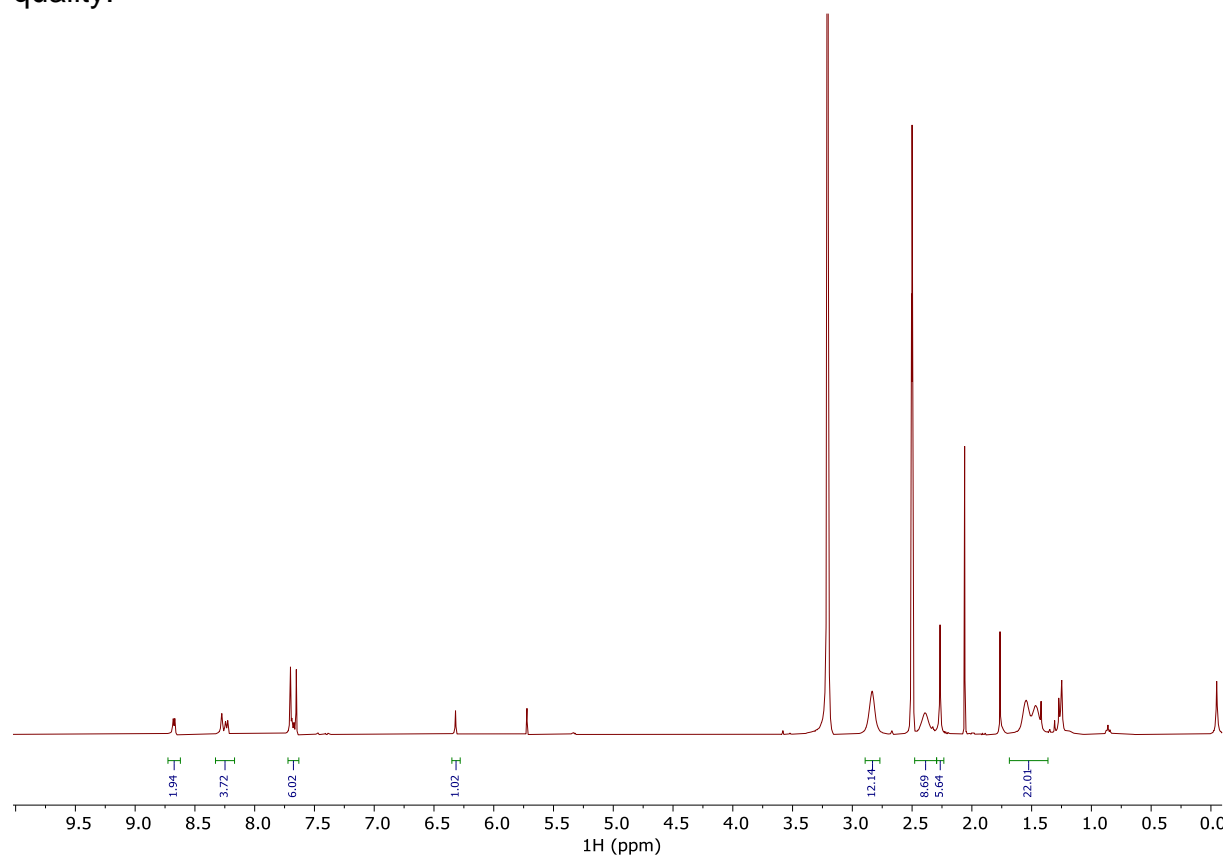

**Figure S15.**  $^1\text{H}$  NMR spectrum (400 MHz,  $\text{DMSO-}d_6$ , 333 K) of cage **5**.

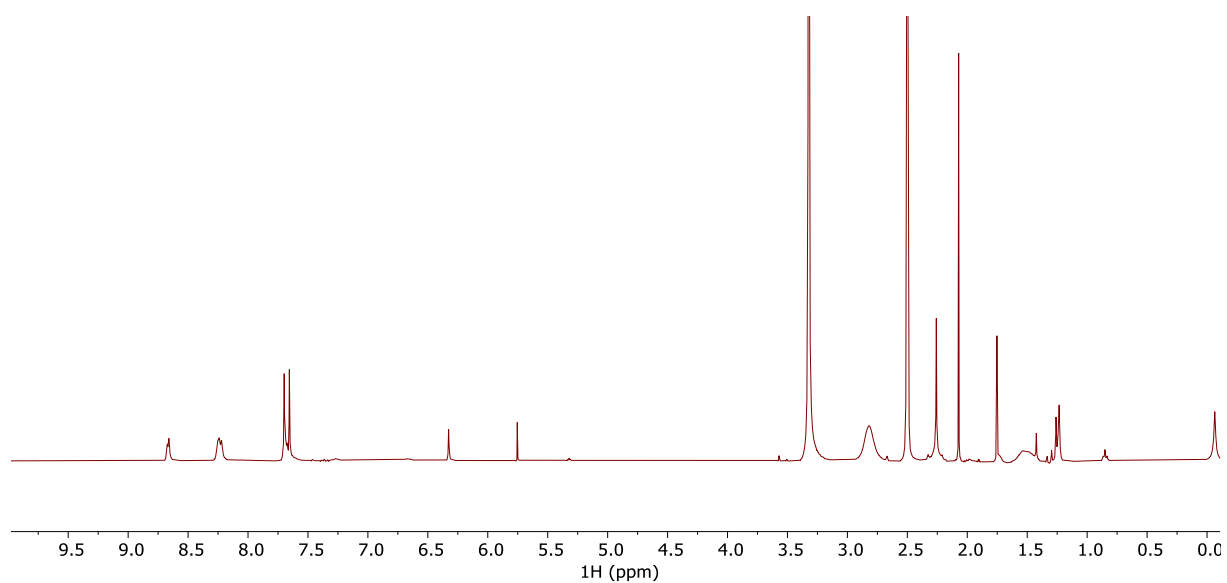

**Figure S16.**  $^1\text{H}$  NMR spectrum (400 MHz,  $\text{DMSO-}d_6$ , 298 K) of cage **5**.

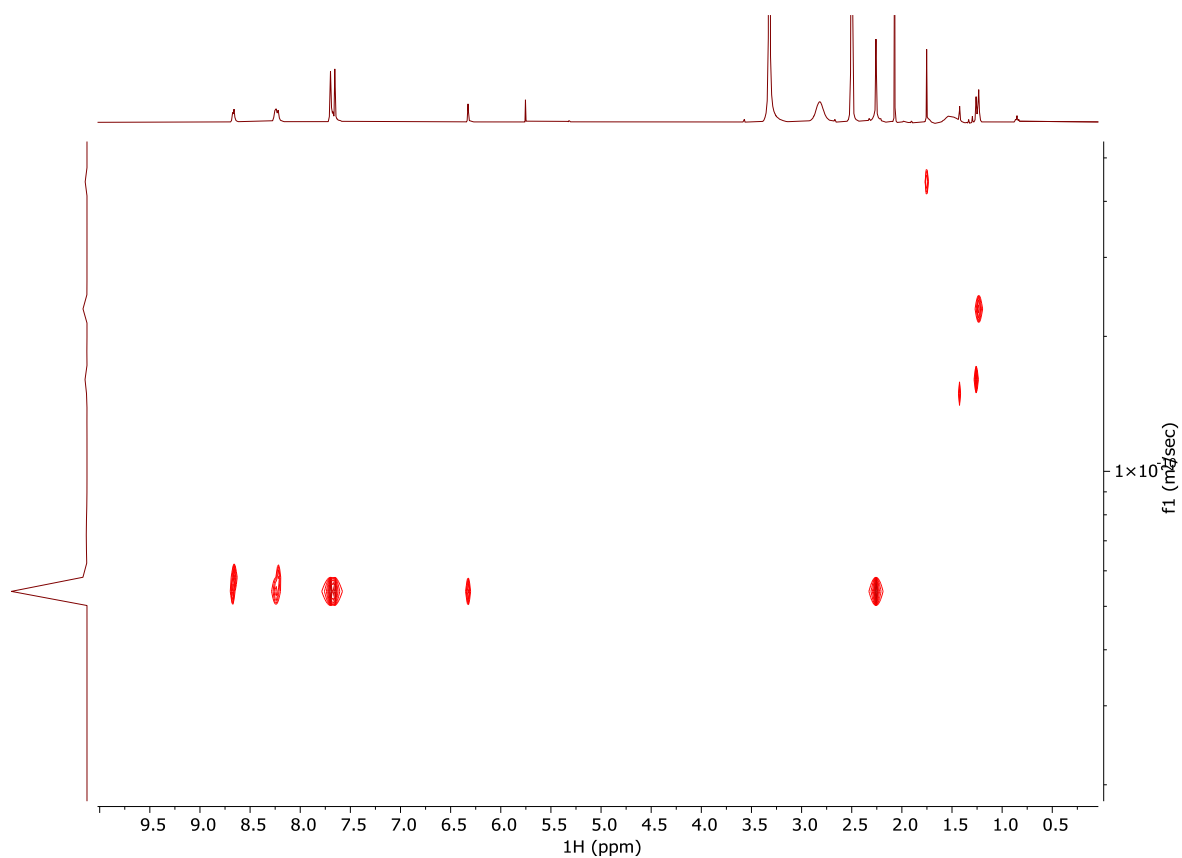

**Figure S17.**  $^1\text{H}$ - $^1\text{H}$  DOSY NMR spectrum (400 MHz,  $\text{DMSO-}d_6$ ) of cage **5** ( $D = 5.41 \times 10^{-11} \text{ m}^2\text{s}^{-1}$ , the calculated solvodynamic diameter of the cage is 2.8 nm).

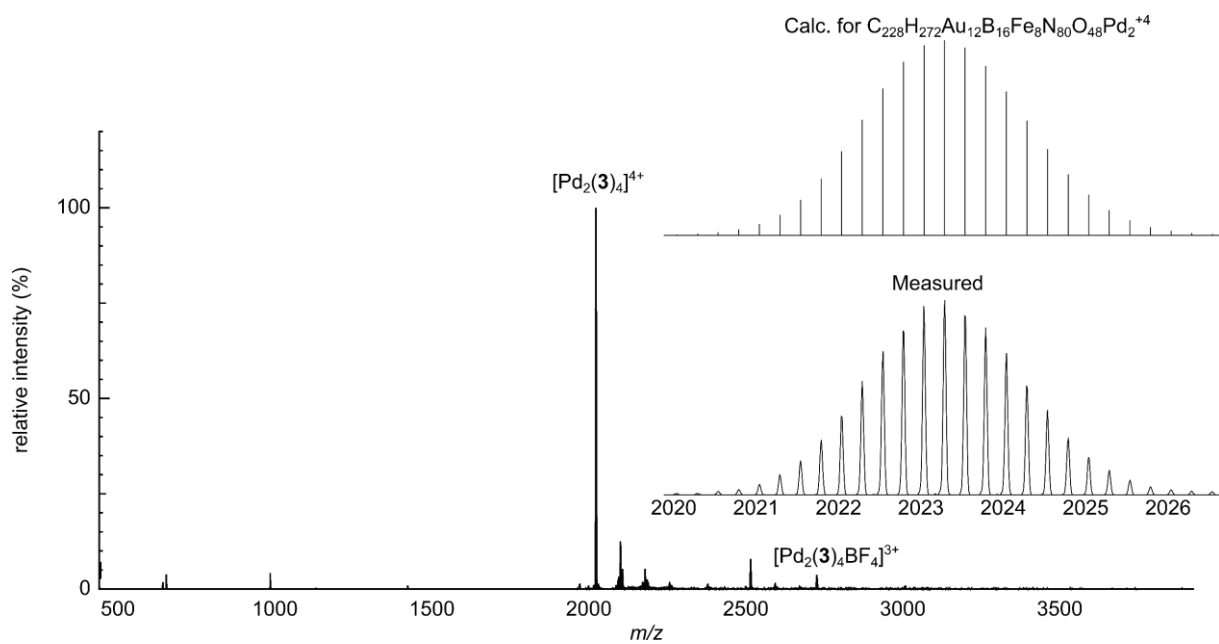

**Figure S18.** High-resolution ESI mass spectrum of cage **5**.



### 3 Crystallographic Data

#### 3.1 Crystal structure of complex 1

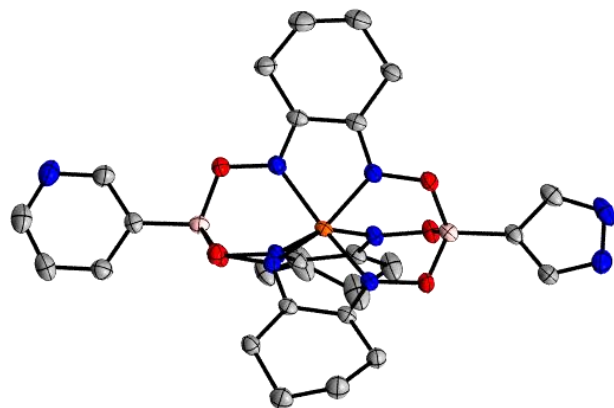

**Figure S19.** ORTP plot at 50% probability of **1**.

Crystals suitable for SCXRD analysis were obtained by slow evaporation of a concentrated MeOH solution of **1**.

A clear intense orange plate-shaped crystal with dimensions  $0.50 \times 0.35 \times 0.03 \text{ mm}^3$  was mounted. Data were collected using an XtaLAB Synergy R, DW system, HyPix-Arc 150 diffractometer operating at  $T = 140.00(10) \text{ K}$ . The structure was solved with the *ShelXT*<sup>6</sup> solution program using dual methods and by using *Olex2*<sup>7</sup> as the graphical interface. The model was refined with *ShelXL*<sup>8</sup> using full matrix least squares minimisation on  $F^2$ .

Data were measured using  $\omega$  scans with  $\text{CuK}\alpha$  radiation. The diffraction pattern was indexed and the total number of runs and images was based on the strategy calculation from the program *CrysAlisPro*.<sup>9</sup> The maximum resolution achieved was  $\theta = 75.235^\circ$  (0.80 Å).

The unit cell was refined using *CrysAlisPro* on 17269 reflections, 36% of the observed reflections.

Data reduction, scaling and absorption corrections were performed using *CrysAlisPro*. The final completeness is 99.70 % out to  $75.235^\circ$  in  $\theta$ . A Gaussian absorption correction was performed using *CrysAlisPro*. Numerical absorption correction based on Gaussian integration over a multifaceted crystal model. Empirical absorption correction using spherical harmonics as implemented in SCALE3 ABSPACK scaling algorithm. The absorption coefficient  $\mu$  of this material is  $4.301 \text{ mm}^{-1}$  at this wavelength ( $\lambda = 1.54184 \text{ \AA}$ ) and the minimum and maximum transmissions are 0.063 and 1.000.

The structure was solved in the space group  $P\bar{1}$  (# 2) determined by the *ShelXT* structure solution program using dual methods and refined by full matrix least squares minimisation on  $R^2$  using version 2019/3 of *ShelXL*. All non-hydrogen atoms were refined anisotropically. Hydrogen atom positions were calculated geometrically and refined using the riding model, but the hydrogen atoms bound to O13 were refined freely.

The value of  $Z$  is 2. This means that there are two independent molecules in the asymmetric unit. The moiety formula is  $C_{26}H_{30}B_2FeN_9O_6$ ,  $H_2O$ , 1.5  $(CH_3OH)$ .

**Table S1.** Crystal data and structure refinement for ligand **1**

|                                                |                                                                                       |
|------------------------------------------------|---------------------------------------------------------------------------------------|
| Formula                                        | C <sub>27.65</sub> H <sub>39.3</sub> B <sub>2</sub> FeN <sub>9</sub> O <sub>8.5</sub> |
| <i>D</i> <sub>calc.</sub> / g cm <sup>-3</sup> | 1.461                                                                                 |
| $\mu$ /mm <sup>-1</sup>                        | 4.297                                                                                 |
| Formula Weight                                 | 711.25                                                                                |
| Colour                                         | clear intense orange                                                                  |
| Shape                                          | plate-shaped                                                                          |
| Size/mm <sup>3</sup>                           | 0.50×0.35×0.03                                                                        |
| <i>T</i> /K                                    | 140.00(10)                                                                            |
| Crystal System                                 | triclinic                                                                             |
| Space Group                                    | <i>P</i> $\bar{1}$                                                                    |
| <i>a</i> /Å                                    | 10.4293(2)                                                                            |
| <i>b</i> /Å                                    | 14.3513(2)                                                                            |
| <i>c</i> /Å                                    | 22.8201(4)                                                                            |
| $\alpha$ /°                                    | 105.9779(14)                                                                          |
| $\beta$ /°                                     | 90.6964(15)                                                                           |
| $\gamma$ /°                                    | 99.3977(14)                                                                           |
| <i>V</i> /Å <sup>3</sup>                       | 3233.67(10)                                                                           |
| <i>Z</i>                                       | 4                                                                                     |
| <i>Z</i> '                                     | 2                                                                                     |
| Wavelength/Å                                   | 1.54184                                                                               |
| Radiation type                                 | CuK $\alpha$                                                                          |
| $\theta$ <sub>min</sub> /°                     | 3.252                                                                                 |
| $\theta$ <sub>max</sub> /°                     | 75.235                                                                                |
| Measured Refl's.                               | 47351                                                                                 |
| Indep't Refl's                                 | 12716                                                                                 |
| Refl's $I \geq 2\sigma(I)$                     | 10382                                                                                 |
| <i>R</i> <sub>int</sub>                        | 0.0399                                                                                |
| Parameters                                     | 924                                                                                   |
| Restraints                                     | 38                                                                                    |
| Largest Peak/e Å <sup>-3</sup>                 | 0.636                                                                                 |
| Deepest Hole/e Å <sup>-3</sup>                 | -0.444                                                                                |
| GooF                                           | 1.064                                                                                 |
| <i>wR</i> <sub>2</sub> (all data)              | 0.1429                                                                                |
| <i>wR</i> <sub>2</sub>                         | 0.1362                                                                                |
| <i>R</i> <sub>1</sub> (all data)               | 0.0618                                                                                |
| <i>R</i> <sub>1</sub>                          | 0.0498                                                                                |
| CCDC number                                    | 2325914                                                                               |

## 3.2 Crystal structure of complex 2

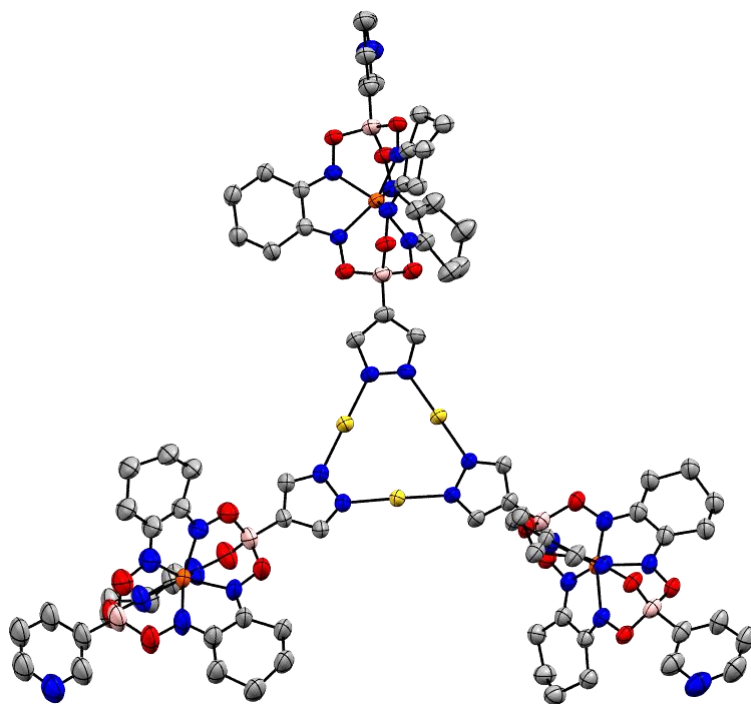

Figure S20. ORTP plot at 50% probability of **2**.

Crystals suitable for SCXRD analysis were obtained slow evaporation of dilute solution of complex **2** in  $\text{CHCl}_3$ : acetonitrile.

A clear intense orange plate-shaped crystal with dimensions  $0.22 \times 0.06 \times 0.03 \text{ mm}^3$  was mounted. Data were collected using a SuperNova, Dual, Cu at home/near, Atlas diffractometer operating at  $T = 230.00(10) \text{ K}$ . The structure was solved with the *ShelXT* solution program using dual methods and by using *Olex2* as the graphical interface. The model was refined with *ShelXL* using full matrix least squares minimisation on  $F^2$ .

Data were measured using  $\omega$  scans with  $\text{CuK}\alpha$  radiation. The diffraction pattern was indexed and the total number of runs and images was based on the strategy calculation from the program *CrysAlis<sup>Pro</sup>*. The maximum resolution achieved was  $\theta = 77.040^\circ$  (0.79 Å).

The unit cell was refined using *CrysAlis<sup>Pro</sup>* on 12566 reflections, 24% of the observed reflections.

Data reduction, scaling and absorption corrections were performed using *CrysAlis<sup>Pro</sup>*. The final completeness is 99.80 % out to  $77.040^\circ$  in  $\theta$ . A Gaussian absorption correction was performed using *CrysAlis<sup>Pro</sup>*. Numerical absorption correction based on Gaussian integration over a multifaceted crystal model. Empirical absorption correction using spherical harmonics as implemented in SCALE3 ABSPACK scaling

algorithm. The absorption coefficient  $\mu$  of this material is  $13.097 \text{ mm}^{-1}$  at this wavelength ( $\lambda = 1.54184 \text{ \AA}$ ) and the minimum and maximum transmissions are 0.278 and 0.857.

The structure was solved in the space group  $P\bar{1}$  (# 2) determined by the *ShelXT* structure solution program using dual methods and refined by full matrix least squares minimisation on  $F^2$  using version 2019/3 of *ShelXL*. All non-hydrogen atoms were refined anisotropically. Hydrogen atom positions were calculated geometrically and refined using the riding model.

There is a single formula unit in the asymmetric unit, which is represented by the reported sum formula. In other words:  $Z$  is 2 and  $Z'$  is 1. The moiety formula is  $\text{C}_{78}\text{H}_{90}\text{Au}_3\text{B}_6\text{Fe}_3\text{N}_{27}\text{O}_{18}, \text{CHCl}_3, \text{C}_2\text{H}_3\text{N}, 0.85[\text{CHCl}_3]$ .

A solvent mask was calculated, and 97 electrons were found in a volume of  $599 \text{ \AA}^3$  in two voids per unit cell. This is consistent with the presence of 0.85 solvent molecule of Chloroform per Asymmetric Unit which accounts for 99 electrons per unit cell.

**Table S2.** Crystal data and structure refinement for complex **2**

|                                   |                                                                                                                                         |
|-----------------------------------|-----------------------------------------------------------------------------------------------------------------------------------------|
| Formula                           | C <sub>81.85</sub> H <sub>94.85</sub> Au <sub>3</sub> B <sub>6</sub> Cl <sub>5.55</sub> Fe <sub>3</sub> N <sub>28</sub> O <sub>18</sub> |
| $D_{calc.}/\text{g cm}^{-3}$      | 1.792                                                                                                                                   |
| $\mu/\text{mm}^{-1}$              | 13.097                                                                                                                                  |
| Formula Weight                    | 2778.96                                                                                                                                 |
| Colour                            | clear intense orange                                                                                                                    |
| Shape                             | plate-shaped                                                                                                                            |
| Size/ $\text{mm}^3$               | 0.22×0.06×0.03                                                                                                                          |
| $T/\text{K}$                      | 230.00(10)                                                                                                                              |
| Crystal System                    | triclinic                                                                                                                               |
| Space Group                       | $P\bar{1}$                                                                                                                              |
| $a/\text{\AA}$                    | 9.9930(3)                                                                                                                               |
| $b/\text{\AA}$                    | 21.4450(7)                                                                                                                              |
| $c/\text{\AA}$                    | 26.8363(8)                                                                                                                              |
| $\alpha^\circ$                    | 108.765(3)                                                                                                                              |
| $\beta^\circ$                     | 99.440(3)                                                                                                                               |
| $\gamma^\circ$                    | 102.247(3)                                                                                                                              |
| $V/\text{\AA}^3$                  | 5151.0(3)                                                                                                                               |
| $Z$                               | 2                                                                                                                                       |
| $Z'$                              | 1                                                                                                                                       |
| Wavelength/ $\text{\AA}$          | 1.54184                                                                                                                                 |
| Radiation type                    | CuK $\alpha$                                                                                                                            |
| $\theta_{min}^\circ$              | 3.376                                                                                                                                   |
| $\theta_{max}^\circ$              | 77.040                                                                                                                                  |
| Measured Refl's.                  | 51716                                                                                                                                   |
| Indep't Refl's                    | 21181                                                                                                                                   |
| Refl's $I \geq 2\sigma(I)$        | 14173                                                                                                                                   |
| $R_{int}$                         | 0.0607                                                                                                                                  |
| Parameters                        | 1355                                                                                                                                    |
| Restraints                        | 1104                                                                                                                                    |
| Largest Peak/ $e \text{\AA}^{-3}$ | 1.936                                                                                                                                   |
| Deepest Hole/ $e \text{\AA}^{-3}$ | -1.424                                                                                                                                  |
| Goof                              | 1.009                                                                                                                                   |
| $wR_2$ (all data)                 | 0.1429                                                                                                                                  |
| $wR_2$                            | 0.1242                                                                                                                                  |
| $R_1$ (all data)                  | 0.0837                                                                                                                                  |
| $R_1$                             | 0.0513                                                                                                                                  |
| CCDC number                       | 2325913                                                                                                                                 |

### 3.3 Crystal structure of complex 3

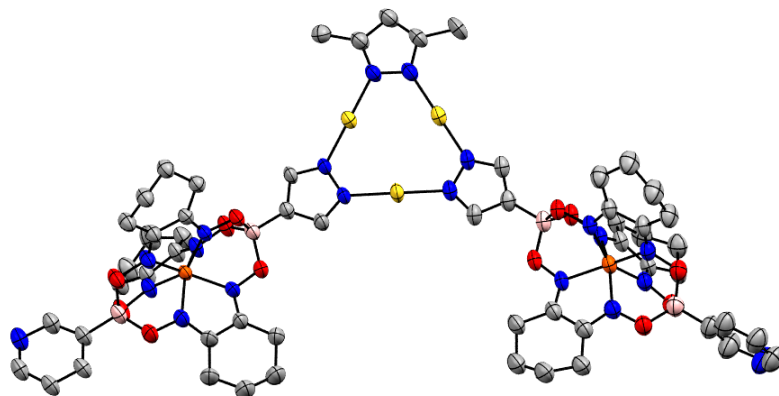

Figure S21. ORTP plot at 50% probability of **3**.

Crystals suitable for SCXRD analysis were obtained by layering acetonitrile onto a solution of complex **3** in  $\text{CH}_2\text{Cl}_2$ .

A clear intense orange plate-shaped crystal with dimensions  $0.14 \times 0.08 \times 0.03 \text{ mm}^3$  was mounted. Data were collected using an XtaLAB Synergy R, DW system, HyPix-Arc 150 diffractometer operating at  $T = 140.00(10) \text{ K}$ . The structure was solved with the *ShelXT* solution program using dual methods and by using *Olex2* as the graphical interface. The model was refined with *ShelXL* using full matrix least squares minimisation on  $R^2$ .

Data were measured using  $\omega$  scans with  $\text{CuK}\alpha$  radiation. The diffraction pattern was indexed and the total number of runs and images was based on the strategy calculation from the program *CrysAlisPro* system. The maximum resolution achieved was  $\theta = 76.311^\circ$  ( $0.79 \text{ \AA}$ ).

The unit cell was refined using *CrysAlisPro* on 28377 reflections, 155% of the observed reflections.

Data reduction, scaling and absorption corrections were performed using *CrysAlisPro*. The final completeness is 99.90 % out to  $76.311^\circ$  in  $Q$ . A Gaussian absorption correction was performed using *CrysAlisPro*. Numerical absorption correction based on Gaussian integration over a multifaceted crystal model. Empirical absorption correction using spherical harmonics as implemented in SCALE3 ABSPACK scaling algorithm. The absorption coefficient  $\mu$  of this material is  $15.683 \text{ mm}^{-1}$  at this wavelength ( $\lambda = 1.54184 \text{ \AA}$ ) and the minimum and maximum transmissions are 0.220 and 0.803.

The structure was solved in the space group  $P\bar{1}$  (# 2) by the *ShelXT* structure solution program using dual methods and refined by full matrix least squares minimisation on  $R^2$  using version 2019/3 of *ShelXL*. All non-hydrogen atoms were refined

anisotropically. Hydrogen atom positions were calculated geometrically and refined using the riding model.

*\_refine\_special\_details*: Refined as a 2-component twin.

*\_twin\_special\_details*: Component 2 rotated by 2.4718° around [0.70 0.44 -0.56] (reciprocal) or [0.81 0.51 -0.29] (direct)

The value of Z' is 0.5. This means that only half of the formula unit is present in the asymmetric unit, with the other half consisting of symmetry equivalent atoms. The moiety formula is C<sub>114</sub>H<sub>134</sub>Au<sub>6</sub>B<sub>8</sub>Fe<sub>4</sub>N<sub>40</sub>O<sub>24</sub>, 2CH<sub>2</sub>Cl<sub>2</sub>, 5[CH<sub>2</sub>Cl<sub>2</sub>].

*\_platon\_squeeze\_special\_details*: A solvent mask was calculated, and 233 electrons were found in a volume of 824 Å<sup>3</sup> in one void per unit cell. This is consistent with the presence of five solvent molecule of DCM per Asymmetric Unit which account for 210 electrons per unit cell.



**Table S3.** Crystal data and structure refinement for complex **3**

|                                                |                                                                                                                                   |
|------------------------------------------------|-----------------------------------------------------------------------------------------------------------------------------------|
| Formula                                        | C <sub>121</sub> H <sub>148</sub> Au <sub>6</sub> B <sub>8</sub> Cl <sub>14</sub> Fe <sub>4</sub> N <sub>40</sub> O <sub>24</sub> |
| <i>D</i> <sub>calc.</sub> / g cm <sup>-3</sup> | 1.886                                                                                                                             |
| <i>μ</i> /mm <sup>-1</sup>                     | 15.683                                                                                                                            |
| Formula Weight                                 | 4534.76                                                                                                                           |
| Colour                                         | clear intense orange                                                                                                              |
| Shape                                          | plate-shaped                                                                                                                      |
| Size/mm <sup>3</sup>                           | 0.14×0.08×0.03                                                                                                                    |
| <i>T</i> /K                                    | 140.00(10)                                                                                                                        |
| Crystal System                                 | triclinic                                                                                                                         |
| Space Group                                    | <i>P</i> $\bar{1}$                                                                                                                |
| <i>a</i> /Å                                    | 13.03697(15)                                                                                                                      |
| <i>b</i> /Å                                    | 13.61355(15)                                                                                                                      |
| <i>c</i> /Å                                    | 23.2896(3)                                                                                                                        |
| <i>α</i> /°                                    | 77.3494(11)                                                                                                                       |
| <i>β</i> /°                                    | 88.5561(10)                                                                                                                       |
| <i>γ</i> /°                                    | 81.9706(10)                                                                                                                       |
| <i>V</i> /Å <sup>3</sup>                       | 3993.48(9)                                                                                                                        |
| <i>Z</i>                                       | 1                                                                                                                                 |
| <i>Z</i> '                                     | 0.5                                                                                                                               |
| Wavelength/Å                                   | 1.54184                                                                                                                           |
| Radiation type                                 | CuKα                                                                                                                              |
| <i>θ</i> <sub>min</sub> /°                     | 1.944                                                                                                                             |
| <i>θ</i> <sub>max</sub> /°                     | 76.311                                                                                                                            |
| Measured Refl's.                               | 18352                                                                                                                             |
| Indep't Refl's                                 | 18352                                                                                                                             |
| Refl's I ≥ 2σ(I)                               | 14104                                                                                                                             |
| <i>R</i> <sub>int</sub>                        | n/a                                                                                                                               |
| Parameters                                     | 913                                                                                                                               |
| Restraints                                     | 1726                                                                                                                              |
| Largest Peak/e Å <sup>-3</sup>                 | 1.752                                                                                                                             |
| Deepest Hole/e Å <sup>-3</sup>                 | -1.650                                                                                                                            |
| Goof                                           | 1.050                                                                                                                             |
| <i>wR</i> <sub>2</sub> (all data)              | 0.1495                                                                                                                            |
| <i>wR</i> <sub>2</sub>                         | 0.1377                                                                                                                            |
| <i>R</i> <sub>1</sub> (all data)               | 0.0731                                                                                                                            |
| <i>R</i> <sub>1</sub>                          | 0.0543                                                                                                                            |
| CCDC number                                    | 2325915                                                                                                                           |

## 4 References

- [1] M. D. Wise, J. J. Holstein, P. Pattison, C. Besnard, E. Solari, R. Scopelliti, G. Bricogne and K. Severin, *Chem. Sci.*, 2015, **6**, 1004–1010.
- [2] G. Yang and R. G. Raptis, *Inorg. Chem.*, 2003, **42**, 261–263.
- [3] S. Ivanova, P. Adamski, E. Köster, L. Schramm, R. Fröhlich and F. Beuerle, *Chem. Eur. J.*, 2024, **30**, e202303318.
- [4] V. Govinda, P. Attri, P. Venkatesu, and P. Venkateswarlu, *Fluid Ph. Equilib.*, 2011, **304**, 35–43.
- [5] H. N. Bordallo, K. W. Herwig, B. M. Luther and N. E. Levinger, *J. Chem. Phys.*, 2004, **121**, 12457–12464
- [6] G. M. Sheldrick, *Acta Cryst.*, 2015, **A71**, 3–8.
- [7] O. V. Dolomanov, L. J. Bourhis, R. J. Gildea, J. A. K. Howard and H. Puschmann, *J. Appl. Cryst.*, 2009, **42**, 339–341.
- [8] G. M. Sheldrick, *Acta Cryst.*, 2015, **C71**, 3–8.
- [9] CrysAlis<sup>Pro</sup> Software System, Rigaku Oxford Diffraction, (2021).
